# Supplementary material for: Astrocytes Differentiated from LRRK2-I1371V Parkinson’s-Disease-Induced Pluripotent Stem Cells Exhibit Similar Yield but Cell-Intrinsic Dysfunction in Glutamate Uptake and Metabolism, ATP Generation, and Nrf2-Mediated Glutathione Machinery
Source: MDPI journal article supplement (doi:10.3390/cells12121592), 2023-06-08
Supplement: s1 [file s1]

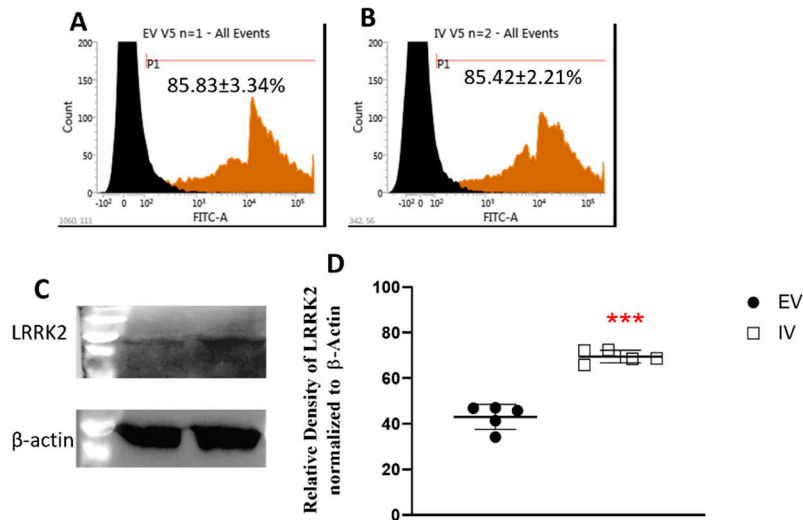

**Supplementary Figure S1:** (A,B) Representative FACS histogram of U87 cells transfected with empty vector (A) and U87 cells transfected with LRRK2 I1371V (B). Cells were identified by light scatter for 10,000 gated events. n=5. (C) Western blot bands obtained using antibodies against LRRK2 from 40μg of extracted cell lysate (EV: U87 cells transfected with EV, IV: U87 cells transfected with LRRK2 I1371V). (D) Densitometry plot of the bands obtained in western blot. Increased protein levels detected with IV cells [\*\*\*p < 0.001], Student's t-Test result: t = 5.6319.

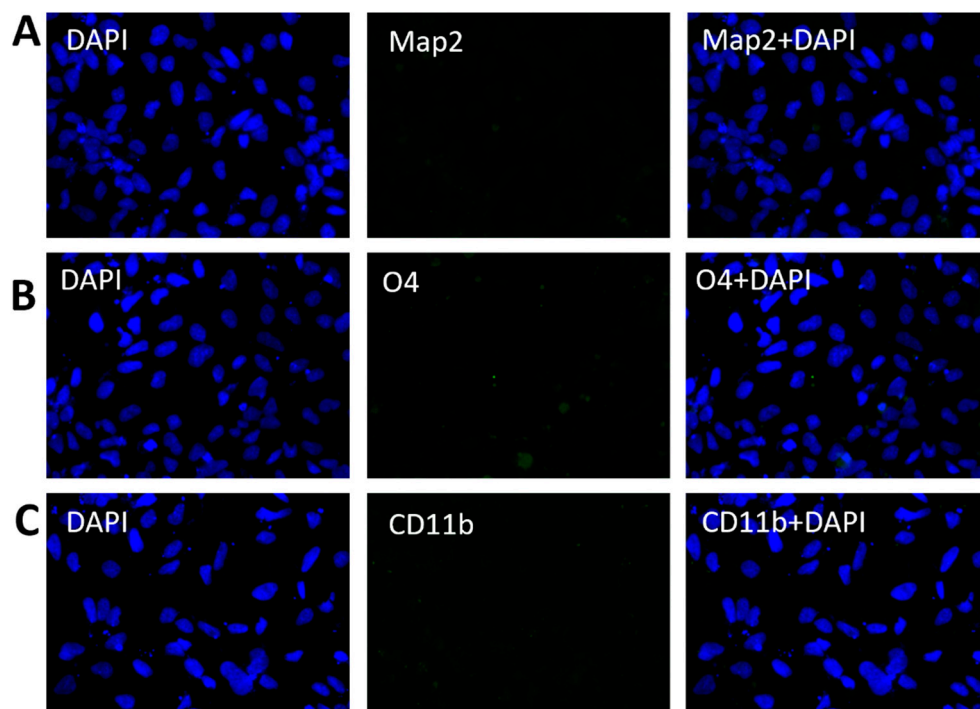

**Supplementary Figure S2: Characterization of astrocytes for neuronal, oligodendrocyte and microglial markers:** (A-C) Representative ICC images of astrocytes from HC and PD iPSC lines immunostained for neuronal marker MAP2 (A), oligodendrocyte marker O4 (B), microglial marker CD11b (C), expression.

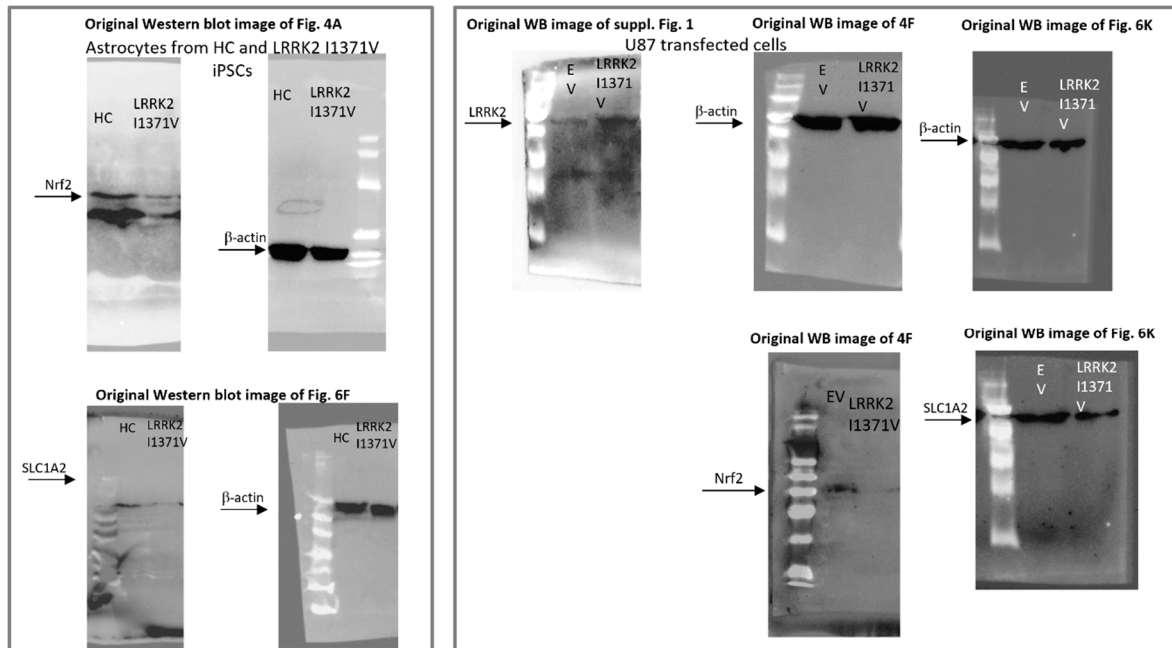

**Supplementary Figure S3:** Images of the whole western blots.

Supplementary Table S1: Research Resource Identifiers (RRID) and other details of the antibodies used in the study.

| <u>S. No.</u> | <u>Name (target)</u> | <u>RRID citation</u>                                   | <u>Species raised in</u> | <u>Concentration used</u>                      | <u>Link to website</u>                                                                                                                                                                                        |
|---------------|----------------------|--------------------------------------------------------|--------------------------|------------------------------------------------|---------------------------------------------------------------------------------------------------------------------------------------------------------------------------------------------------------------|
| 1             | Anti-SSEA4 (SSEA4)   | Thermo Fisher Scientific Cat# MA1-021, RRID:AB_2536687 | Mouse                    | 1:100 (Immunocytochemistry and Flow cytometry) | <a href="https://www.thermofisher.com/antibody/product/SSEA4-Antibody-clone-MC-813-70-Monoclonal/MA1-021">https://www.thermofisher.com/antibody/product/SSEA4-Antibody-clone-MC-813-70-Monoclonal/MA1-021</a> |

|   |                                    |                                                                     |        |                                                              |                                                                                                                                                                                               |
|---|------------------------------------|---------------------------------------------------------------------|--------|--------------------------------------------------------------|-----------------------------------------------------------------------------------------------------------------------------------------------------------------------------------------------|
| 2 | Anti-A2B5<br>(A2B5)                | Innovative Research<br>Cat# 433110,<br>RRID:AB_1501794              | Mouse  | 1:100<br>(Immunocyto-<br>chemistry and<br>Flow<br>cytometry) | <a href="https://www.thermofisher.com/antibody/product/A2B5-Antibody-clone-105-Monoclonal/433110">https://www.thermofisher.com/antibody/product/A2B5-Antibody-clone-105-Monoclonal/433110</a> |
| 3 | Anti-NF1A<br>(NF1A)                | Thermo Fisher<br>Scientific Cat# PA5-<br>79735,<br>RRID:AB_2746850  | Rabbit | 1:100<br>(Immunocyto-<br>chemistry and<br>Flow<br>cytometry) | <a href="https://www.thermofisher.com/antibody/product/NF1A-Antibody-Polyclonal/PA5-79735">https://www.thermofisher.com/antibody/product/NF1A-Antibody-Polyclonal/PA5-79735</a>               |
| 4 | Anti-GFAP<br>(GFAP)                | Thermo Fisher<br>Scientific Cat# PA5-<br>16291,<br>RRID:AB_10980769 | Rabbit | 1:100<br>(Immunocyto-<br>chemistry and<br>Flow<br>cytometry) | <a href="https://www.thermofisher.com/antibody/product/GFAP-Antibody-Polyclonal/PA5-16291">https://www.thermofisher.com/antibody/product/GFAP-Antibody-Polyclonal/PA5-16291</a>               |
| 5 | Anti-<br>SLC1A2<br>(SLC1A2)        | Sigma-Aldrich Cat#<br>WH0006506M10,<br>RRID:AB_1841786              | Mouse  | 1:100<br>(Immunocyto-<br>chemistry and<br>Flow<br>cytometry) | <a href="https://www.sigmaaldrich.com/IN/en/product/sigma/wh0006506m10">https://www.sigmaaldrich.com/IN/en/product/sigma/wh0006506m10</a>                                                     |
| 6 | Anti-Nanog<br>(Nanog)              | Abcam Cat#<br>ab21624,<br>RRID:AB_446437                            | Rabbit | 1:100<br>(Immunocyto-<br>chemistry and<br>Flow<br>cytometry) | <a href="https://www.abcam.com/nanog-antibody-ab21624.html">https://www.abcam.com/nanog-antibody-ab21624.html</a>                                                                             |
| 7 | Recombinant<br>Anti-Oct4<br>(Oct4) | Abcam Cat#<br>ab21624,<br>RRID:AB_446437                            | Rabbit | 1:100<br>(Immunocyto-<br>chemistry)                          | <a href="https://www.abcam.com/oct4-antibody-epr17929-chip-">https://www.abcam.com/oct4-antibody-epr17929-chip-</a>                                                                           |

|    |                                                          |                                            |        |                                                         |                                                                                                                                                                                     |
|----|----------------------------------------------------------|--------------------------------------------|--------|---------------------------------------------------------|-------------------------------------------------------------------------------------------------------------------------------------------------------------------------------------|
|    |                                                          | Abcam Cat#<br>ab27985,<br>RRID:AB_776898   | Goat   | 1:100 (Flow<br>cytometry)                               | grade-<br>ab181557.html<br><br><a href="https://www.abcam.com/oct4-antibody-ab27985.html">https://www.abcam.com/oct4-antibody-ab27985.html</a>                                      |
| 8  | Anti-TRA-1-60<br>(TRA-1-60)                              | Abcam Cat#<br>ab16288,<br>RRID:AB_778563   | Mouse  | 1:100<br>(Immunocytochemistry and<br>Flow<br>cytometry) | <a href="https://www.abcam.com/tra-1-60-r-antibody-tra-1-60-ab16288.html">https://www.abcam.com/tra-1-60-r-antibody-tra-1-60-ab16288.html</a>                                       |
| 9  | Recombinant<br>Anti-Nestin<br>(Nestin)                   | Abcam Cat#<br>ab176571,<br>RRID:AB_2895536 | Rabbit | 1:100<br>(Immunocytochemistry and<br>Flow<br>cytometry) | <a href="https://www.abcam.com/nestin-antibody-epr13012-ab176571.html">https://www.abcam.com/nestin-antibody-epr13012-ab176571.html</a>                                             |
| 10 | Recombinant<br>Anti-<br>Musashi1<br>(Musashi1<br>[Msi1]) | Abcam Cat#<br>ab52865,<br>RRID:AB_881168   | Rabbit | 1:100<br>(Immunocytochemistry and<br>Flow<br>cytometry) | <a href="https://www.abcam.com/musashi-1-msi1-antibody-ep1302-ab52865.html">https://www.abcam.com/musashi-1-msi1-antibody-ep1302-ab52865.html</a>                                   |
| 11 | Anti-S100 $\beta$<br>(S100-A1)                           | Abcam Cat# ab868,<br>RRID:AB_306716        | Rabbit | 1:100<br>(Immunocytochemistry and<br>flow<br>cytometry) | <a href="https://www.citeab.com/antibodies/760370-ab868-anti-s100-antibody-astrocyte-marker">https://www.citeab.com/antibodies/760370-ab868-anti-s100-antibody-astrocyte-marker</a> |
| 12 | Anti-<br>Aquaporin<br>(Aquaporin<br>4)                   | Abcam Cat#<br>ab46182,<br>RRID:AB_955676   | Rabbit | 1:100<br>(Immunocytochemistry and<br>flow<br>cytometry) | <a href="https://www.abcam.com/aquaporin-4-antibody-ab46182.html">https://www.abcam.com/aquaporin-4-antibody-ab46182.html</a>                                                       |
| 13 | Anti-MAP2                                                | Thermo Fisher<br>Scientific Cat# MA5-      | Mouse  | 1:100<br>(Immunocyto-                                   | <a href="https://www.thermo-fisher.com/antibody">https://www.thermo-fisher.com/antibody</a>                                                                                         |

|    |                                                                          |                                                      |                          |                                                              |                                                                                                                                                                                                                                                                                                              |
|----|--------------------------------------------------------------------------|------------------------------------------------------|--------------------------|--------------------------------------------------------------|--------------------------------------------------------------------------------------------------------------------------------------------------------------------------------------------------------------------------------------------------------------------------------------------------------------|
|    |                                                                          | 12823,<br>RRID:AB_10982160                           |                          | chemistry and<br>flow<br>cytometry)                          | /product/MAP2-<br>Antibody-clone-<br>AP20-<br>Monoclonal/MA5-<br>12823                                                                                                                                                                                                                                       |
| 14 | Anti-CD11b                                                               | Millipore Cat#<br>CBL1512,<br>RRID:AB_93253)         | Mouse                    | 1:100<br>(Immunocyto-<br>chemistry and<br>flow<br>cytometry) | <a href="https://www.merckmillipore.com/IN/en/product/Anti-Integrin-M-CD11b-Antibody-clone-OX-42,MM_NF-CBL1512">https://www.merckmillipore.com/IN/en/product/Anti-Integrin-M-CD11b-Antibody-clone-OX-42,MM_NF-CBL1512</a>                                                                                    |
| 15 | Anti-O4                                                                  | (R and D Systems<br>Cat# MAB1326,<br>RRID:AB_357617) | Mouse                    | 1:100<br>(Immunocyto-<br>chemistry and<br>flow<br>cytometry) | <a href="https://www.rndsystems.com/products/human-mouse-rat-chicken-oligodendrocyte-marker-o4-antibody-o4_mab1326#product-datasheets">https://www.rndsystems.com/products/human-mouse-rat-chicken-oligodendrocyte-marker-o4-antibody-o4_mab1326#product-datasheets</a>                                      |
| 16 | Anti-MRP1<br>(MRP1)                                                      | Abcam Cat#<br>ab24102,<br>RRID:AB_447868             | Mouse                    | 1:100 (flow<br>cytometry)                                    | <a href="https://www.abcam.com/mrp1-antibody-mrpm5-ab24102.html">https://www.abcam.com/mrp1-antibody-mrpm5-ab24102.html</a>                                                                                                                                                                                  |
| 17 | Secondary<br>antibody<br>tagged with<br>Alexa Fluor®<br>488 (IgG<br>H&L) | Abcam Cat#<br>ab150113,<br>RRID:AB_2576208           | Goat<br>against<br>mouse | 1:200<br>(Immunocyto-<br>chemistry and<br>flow<br>cytometry) | <a href="https://www.abcam.com/goat-mouse-igg-hl-alex-fluor-488-ab150113.html">https://www.abcam.com/goat-mouse-igg-hl-alex-fluor-488-ab150113.html</a><br><br><a href="https://www.abcam.com/goat-rabbit-igg-hl-alex-fluor-488-ab150113.html">abcam.com/goat-rabbit-igg-hl-alex-fluor-488-ab150113.html</a> |

|    |                                                                          |                                                                                              |                                                             |                                                                  |                                                                                                                                                                                                                                                                                                                              |
|----|--------------------------------------------------------------------------|----------------------------------------------------------------------------------------------|-------------------------------------------------------------|------------------------------------------------------------------|------------------------------------------------------------------------------------------------------------------------------------------------------------------------------------------------------------------------------------------------------------------------------------------------------------------------------|
|    |                                                                          | Abcam Cat#<br>ab150077,<br>RRID:AB_2630356                                                   | Goat<br>against<br>rabbit                                   |                                                                  | fluor-488-<br>ab150077.html                                                                                                                                                                                                                                                                                                  |
| 18 | Secondary<br>antibody<br>tagged with<br>Alexa Fluor®<br>647 (IgG<br>H&L) | Abcam Cat#<br>ab150115,<br>RRID:AB_2687948<br><br>Abcam Cat#<br>ab150075,<br>RRID:AB_2752244 | Goat<br>against<br>mouse<br><br>Donkey<br>against<br>rabbit | 1:200<br><br>(Immunocyto-<br>chemistry and<br>flow<br>cytometry) | <a href="https://www.abcam.com/goat-mouse-igg-hl-alex-fluor-647-ab150115.html">https://www.abcam.com/goat-mouse-igg-hl-alex-fluor-647-ab150115.html</a><br><br><a href="https://www.abcam.com/donkey-rabbit-igg-hl-alex-fluor-647-ab150075.html">https://www.abcam.com/donkey-rabbit-igg-hl-alex-fluor-647-ab150075.html</a> |
| 19 | Anti-β-actin<br>(β-actin)                                                | (Abcam Cat# ab8227,<br>RRID:AB_2305186)                                                      | Mouse                                                       | 1:1000<br><br>(Western blot)                                     | <a href="https://www.abcam.com/beta-actin-antibody-ab8227.html">https://www.abcam.com/beta-actin-antibody-ab8227.html</a>                                                                                                                                                                                                    |
| 20 | HRP<br>conjugated<br>secondary<br>antibody<br>(IgG H&L)                  | Abcam Cat#<br>ab97051,<br>RRID:AB_10679369<br><br>Abcam Cat#<br>ab97023,<br>RRID:AB_10679675 | Goat<br>against<br>rabbit<br><br>Goat<br>against<br>mouse   | 1:2000<br><br>(Western blot)                                     | <a href="https://www.abcam.com/goat-rabbit-igg-hl-hrp-ab97051.html">https://www.abcam.com/goat-rabbit-igg-hl-hrp-ab97051.html</a><br><br><a href="https://www.abcam.com/goat-mouse-igg-hl-hrp-ab97023.html">https://www.abcam.com/goat-mouse-igg-hl-hrp-ab97023.html</a>                                                     |
| 21 | Anti-<br>Vimentin<br>antibody<br>(Vimentin)                              | BD Biosciences Cat#<br>550513,<br>RRID:AB_393716                                             | Mouse                                                       | 1:100<br><br>(Immunocyto-<br>chemistry and<br>flow<br>cytometry) | <a href="https://www.bdbiosciences.com/ko-kr/products/reagents/microscopy-imaging-reagents/purified-mouse-anti-vimentin.550513">https://www.bdbiosciences.com/ko-kr/products/reagents/microscopy-imaging-reagents/purified-mouse-anti-vimentin.550513</a>                                                                    |

|    |                           |                                                           |        |                                                      |                                                                                                                                                                                                                 |
|----|---------------------------|-----------------------------------------------------------|--------|------------------------------------------------------|-----------------------------------------------------------------------------------------------------------------------------------------------------------------------------------------------------------------|
| 22 | Anti-Nrf2 antibody (Nrf2) | Santa Cruz Biotechnology Cat# sc-365949, RRID:AB_10917561 | Rabbit | 1:1000 (Western blot)<br>1:100 (Immunocytochemistry) | <a href="https://www.scbt.com/p/nrf2-antibody-a-10">https://www.scbt.com/p/nrf2-antibody-a-10</a>                                                                                                               |
| 23 | Anti-V5 tag antibody      | Thermo Fisher Scientific Cat# MA1-34099, RRID:AB_1959285  | Mouse  | 1:100 (Immunocytochemistry)                          | <a href="https://www.thermofisher.com/antibody/product/V5-Tag-Antibody-clone-SV5-Pk1-Monoclonal/MA1-34099">https://www.thermofisher.com/antibody/product/V5-Tag-Antibody-clone-SV5-Pk1-Monoclonal/MA1-34099</a> |
| 24 | Anti-LRRK2 antibody       | Thermo Fisher Scientific Cat# PA5-18319, RRID:AB_10988665 | Goat   | 1:1000 (Western blot)                                | <a href="https://www.thermofisher.com/antibody/product/LRRK2-Antibody-Polyclonal/PA5-18319">https://www.thermofisher.com/antibody/product/LRRK2-Antibody-Polyclonal/PA5-18319</a>                               |

Supplementary Table S2: Primer list

| Gene name                                     | Forward/<br>Reverse | Sequence (5' – 3')        |
|-----------------------------------------------|---------------------|---------------------------|
| <i>18S</i>                                    | Forward             | CGGCTACCACATCCAAGGAA      |
|                                               | Reverse             | GCTGGAATTACCGCGGCT        |
| <i>CD44</i>                                   | Forward             | TTACACCTTTTCTACTGTACACCCC |
|                                               | Reverse             | TCAGATCCATGAGTGGTATGGGAC  |
| <i>Nuclear factor 1 A-type (NF1A)</i>         | Forward             | GACTTCTGGCAAAGTTGCGG      |
|                                               | Reverse             | TCGCATCTTGCCTTTCTGGT      |
| <i>Glial fibrillary acidic protein (GFAP)</i> | Forward             | ATCGAGAAGGTTGCTTCCTG      |
|                                               | Reverse             | TGTTGGCGGTGAGTTGATCG      |
| <i>S100β</i>                                  | Forward             | GGAGACAAGCACAAGCTGAAG     |
|                                               | Reverse             | AGCTACAACACGGCTGGAAAG     |
| <i>Aquaporin 4 (AQP4)</i>                     | Forward             | GGAATCCTCTATCTGGTCACA     |
|                                               | Reverse             | TGTTTGCTGGGCAGCTTTGCT     |
| <i>Glutamine synthase (GS)</i>                | Forward             | CTGCCATACCAACTTCAGCACC    |
|                                               | Reverse             | ATAGGCACGGATGTGGTACTGG    |

|                                                   |         |                         |
|---------------------------------------------------|---------|-------------------------|
| <i>System N amino acid transporter-1 (SN1)</i>    | Forward | GCCACTTGTCATACAGACCTTCC |
|                                                   | Reverse | GGCAGAATGATGGTGACAGAGAC |
| <i>Solute carrier family 1, member 2 (SLC1A2)</i> | Forward | TGCCAACAGAGGACATCAGCCT  |
|                                                   | Reverse | CAGCTCAGACTTGGAGAGGTGA  |
| <i>Solute carrier family 1, member 3 (SLC1A3)</i> | Forward | GGTTGCTGCAAGCACTCATCAC  |
|                                                   | Reverse | CACGCCATTGTTCTCTTCCAGG  |
| <i>Glutamate dehydrogenase (GDH)</i>              | Forward | CTCCAGACATGAGCACAGGTGA  |
|                                                   | Reverse | CCAGTAGCAGAGATGCGTCCAT  |
| <i>Glutathione synthetase (GSS)</i>               | Forward | CCAAGACCGAAGGCTGTTTGTG  |
|                                                   | Reverse | TGTGACCTCTCCAGCAGTAGAC  |
| <i>Glutathione peroxidase (GPx)</i>               | Forward | TTCGAGCCCAACTTCATGCT    |
|                                                   | Reverse | CGATGTCAGGCTCGATGTCA    |
| <i>Glutathione reductase (GR)</i>                 | Forward | TATGTGAGCCGCCTGAATGCCA  |
|                                                   | Reverse | CACTGACCTCTATTGTGGGCTTG |
| <i>Glutamyl cysteine ligase C (GCLC)</i>          | Forward | GGAAGTGGATGTGGACACCAGA  |
|                                                   | Reverse | GCTTGTAGTCAGGATGGTTTGCG |
